# Supplementary material for: Service-Dominant Business Model Design for Digital Innovation in Smart Mobility
Source: Springer Nature journal article supplement (doi:10.1007/s12599-018-0565-x), 2018-11-22
Supplement: MOESM1 [file 16289368]

# **Service-Dominant Business Model Design for Digital Innovation in Smart Mobility**

**Oktay Turetken, Paul Grefen, Rick Gilsing, O. Ege Adali**

Business & Information Systems Engineering (2018)

**Appendix (available online via <http://link.springer.com>)**

## Appendix A

### *Appendix A: The Questionnaire*

PART-1: Please provide feedback about the business model design approach followed during the workshop.  
(For all items using the following Likert scale: Strongly disagree; Disagree; Neutral; Agree; Strongly agree)

- Q1. I think this approach provides an effective solution to the problem of designing business models.
- Q2. Business models designed in this way would be difficult for users (colleagues, partner companies, etc.) to understand.
- Q3. Using this approach would make it more difficult to communicate the business models to others.
- Q4. Overall, I found the business model design approach in this workshop to be useful.
- Q5. Learning to use this way of designing business models would be easy for me.
- Q6. I found the way the business models are designed as unclear and difficult to understand.
- Q7. It would be easy for me to become skillful at using this way of designing business models.
- Q8. Overall, I found this way of designing business models difficult to use.
- Q9. I would use this method to design business models.
- Q10. I would intend to use this way of designing business models in preference to another design approach if I have to design business models in the future.

PART-2 (*Respondent demographics*)

- Q11. What is your current position?
- Q12. How long have you been working in this position?  
(*Less than 2 years, 2-4 years, 4-7 years, 7-10 years, More than 10 years*)
- Q13. How long have you been working in the industry?  
(*Less than 2 years, 2-4 years, 4-7 years, 7-10 years, More than 10 years*)
- Q14. In which industry the company you work in operates?
- Q15. What is the size of your company?  
(*Options for Q15: Below 10 employees, 11-50 employees, 51-250 employees, 251-1000 employees, 1001-5000 employees, Over 5000 employees*)
- Q16. How familiar are you in using any technique or approach in designing business models?  
(*Options for Q16: Not at all familiar, Slightly familiar, Somewhat familiar, Moderately familiar, Extremely familiar*)

PART 3: (*Feedback*)

- Q17. Please indicate what you would consider the strong points of the Service-Dominant Business Model Radar approach.
- Q18. Please indicate what you would consider the weak points or points that can be improved about the Service-Dominant Business Model Radar approach
- Q19. Any additional remark?
